# Supplementary material
Source: PubMed Central journal article supplement (PMC3751409)
Supplement: NIHMS475918-supplement-s1.pdf [file NIHMS475918-supplement-s1.pdf]

## Supplemental Information

### Acquisition of an animal gene by microsporidian intracellular parasites

Mohammed Selman, Jean-François Pombert, Leellen Solter, Laurent Farinelli, Louis M. Weiss, Patrick Keeling and Nicolas Corradi

**Figure S1 (Related to Figure 1): A. Phylogeny of the genus *Encephalitozoon* and presence of a new gene in *Encephalitozoon romaleae* and *Encephalitozoon hellem*. B. Phylogenies of the PNP genes from *E. romaleae* and *E. hellem* after removal of the longest branches from Arthropods;**

**A.** Alignment of highly collinear sections of approximately 13kb from *E. romaleae* and *E. hellem* that are homologous to regions of chromosome 1 of *Encephalitozoon cuniculi* and *E. intestinalis*, and phylogeny of the genus *Encephalitozoon* based on the amino acid sequence of 20 conserved genes (8155 amino acids in total). Values at nodes represent bootstrap and posterior probabilities support obtained using Minimum evolution (JTT model of evolution), as well as PhyML, RAxML, and Mr bayes (WAG model of evolution). The location of the purine nucleoside phosphorylase (PNP) genes in *E. romaleae* and *E. hellem* are shown in red. Conserved hypothetical proteins are shown as black rectangles, whereas genes encoding for proteins with known functions are shown as coloured rectangles. Dashed lines indicate portions of the genome sequence that are missing a particular gene. The GenBank accession number for the *E. romaleae* contig containing the PNP gene is JF808666. **B.** Phylogenetic relationships between the PNP genes of several eukaryotic and prokaryotic lineages based on 240 amino acid positions after removal of sequences corresponding to *Pediculus humanus* and Crustaceans. Major lineages are indicated by coloured boxes, while black circles indicate branches with bootstrap support of over 95% from Maximum Likelihood analyses (WAG model of evolution) and posterior probabilities over 0.95 obtained using Mr bayes (WAG model of evolution) and Phylobayes (CAT and LG models of evolution). Red circles indicate branches with posterior probabilities of 1 using Mr bayes, but with bootstrap support and posterior probabilities sometimes below 95% and 0.95 for either Maximum Likelihood analyses (WAG model of evolution), or for the Bayesian analyses performed under the CAT and LG models of evolution implemented in Phylobayes.

A

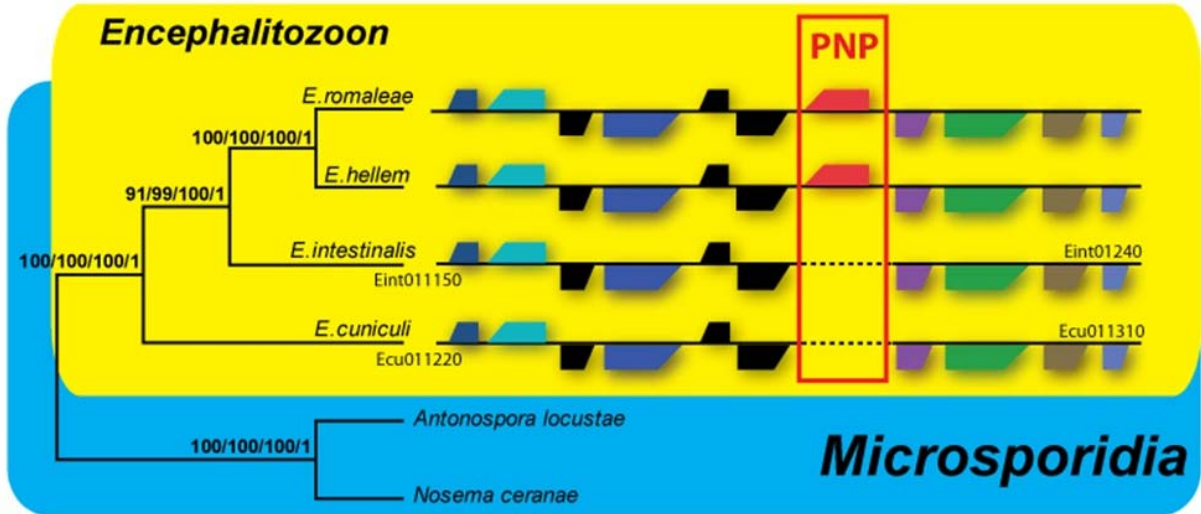

B

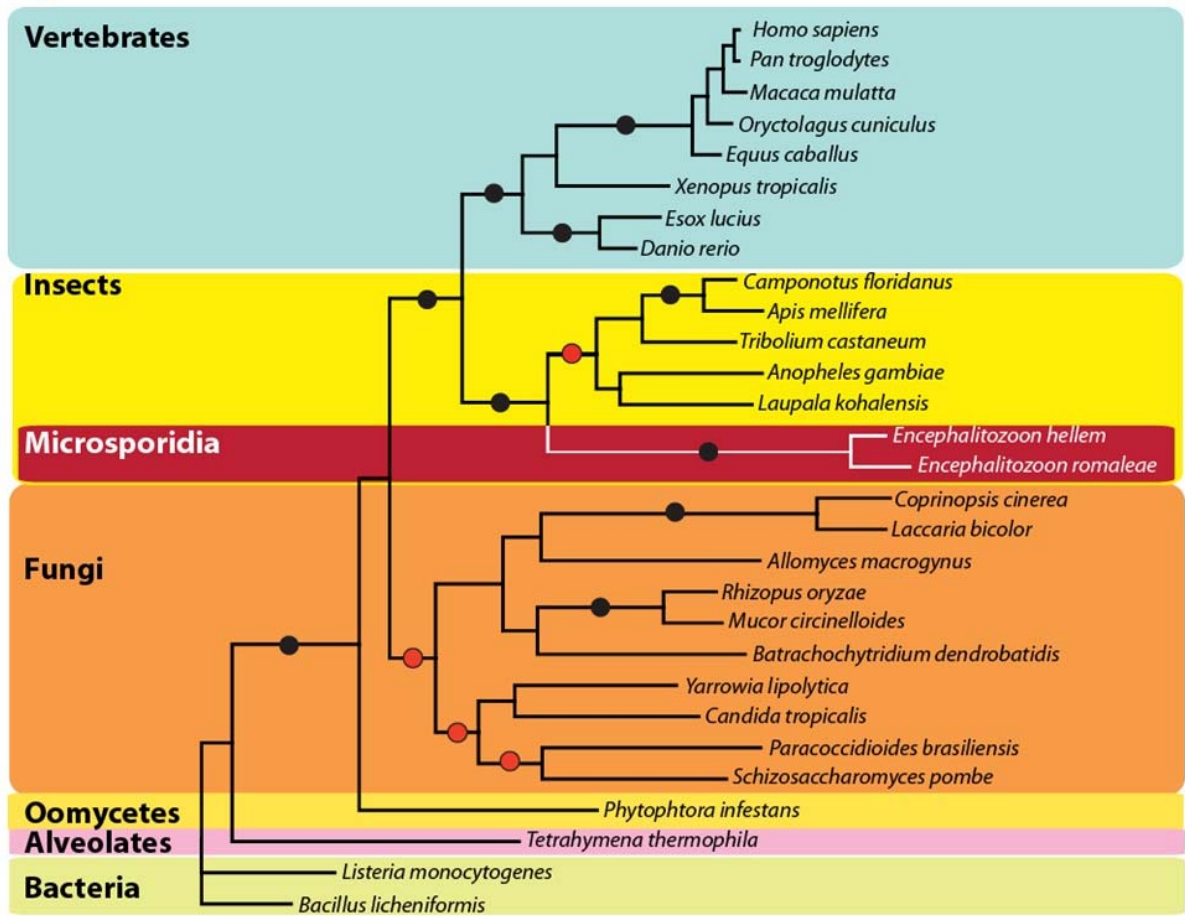

0.2

## Supplemental Experimental Procedures

### *Identification of putative animal-derived genes in the E. romaleae genome*

Open reading frames (ORFs) were annotated across the genome survey of *Encephalitozoon romaleae* using Artemis [S1]. Potential LGTs of animal origin were searched, at first, across annotated ORFs using a number blast procedures (Blastp, Blastx, tBlastn, tBlastx) [S2] against available microsporidian genome data and the ‘non-redundant’ repository at NCBI. One gene found to be absent from any other available microsporidian sequence data (PNP), was also found to show strong sequence similarities against a number of metazoan sequences following Blast searches. Its metazoan origin was further tested using a number of phylogenetic methodologies, as explained in the section below.

### *Phylogenetic analyses*

Amino acid sequences of PNP’s eukaryotic orthologs (best reciprocal blast hits) were acquired from RefSeq GenBank, ESTdb, and from complete eukaryotic genome databases from the Broad institute and DOE Joint Genome Institute. GenBank accession numbers used for phylogenetic reconstruction can be found in the table below. Protein sequences were aligned using MUSCLE 3.7[S3], with a maximum number of iterations of 16. Poorly aligned positions and divergent regions of the alignment were removed using GBlocks 0.91b and default settings [S4], resulting in a data set of 174 amino acids. Trimal [S5], a less stringent trimming tool, was also used to remove non-informative amino acid regions from the alignment using the “strict method”. The resulting alignment contained a suite of 240 amino acids.

Table: List of accession numbers (GenBank) and species used in phylogenetic analyses of PNP genes, Related to Figure 1.

| PNP<br>Accession | Species Name                                                            | Group     |
|------------------|-------------------------------------------------------------------------|-----------|
| YP_079657        | <i>Bacillus licheniformis</i> ATCC 14580                                | Bacteria  |
| NP_465477        | <i>Listeria monocytogenes</i> EGD-e                                     | Bacteria  |
| XP_001020972     | <i>Tetrahymena thermophila</i><br><i>Batrachochytrium dendrobatidis</i> | Alveolata |
| EGF83310         | <i>JAM81</i>                                                            | Fungi     |
| EEH43246         | <i>Paracoccidioides brasiliensis</i> Pb18                               | Fungi     |
| XP_506036        | <i>Yarrowia lipolytica</i> CLIB122                                      | Fungi     |
| XP_002548301     | <i>Candida tropicalis</i> MYA-3404                                      | Fungi     |
| NP_593927        | <i>Schizosaccharomyces pombe</i> 972h-                                  | Fungi     |
| XP_001837849     | <i>Coprinopsis cinerea</i> okayama7#130                                 | Fungi     |
| XP_001878763     | <i>Laccaria bicolor</i> S238N-H82                                       | Fungi     |
| AMAG_14981.1**   | <i>Allomyces macrogynus</i>                                             | Fungi     |
| RO3G_00999**     | <i>Rhizopus oryzae</i>                                                  | Fungi     |
| 105288*          | <i>Mucor circinelloides</i> CBS277.49                                   | Fungi     |
| EFX76980         | <i>Daphnia pulex</i>                                                    | Crustacea |
| ACO14860         | <i>Caligus clemensi</i>                                                 | Crustacea |

|              |                                      |                |
|--------------|--------------------------------------|----------------|
| XP_967070    | <i>Tribolium castaneum</i>           | Hexapoda       |
| XP_001688760 | <i>Anopheles gambiae str. PEST</i>   | Hexapoda       |
| XP_391850    | <i>Apis mellifera</i>                | Hexapoda       |
| EFN71333     | <i>Camponotus floridanus</i>         | Hexapoda       |
| XP_002427236 | <i>Pediculus humanus corporis</i>    | Hexapoda       |
| EH641232     |                                      |                |
| EH634545***  | <i>Laupala kohalensis</i>            | Hexapoda       |
| ACO14424     | <i>Esox lucius</i>                   | Actinopterygii |
| NP_998476    | <i>Danio rerio</i>                   | Actinopterygii |
| NP_001006720 | <i>Xenopus (Silurana) tropicalis</i> | Amphibia       |
| XP_002718082 | <i>Oryctolagus cuniculus</i>         | Mammalia       |
| XP_001104622 | <i>Macaca mulatta</i>                | Mammalia       |
| NP_000261    | <i>Homo sapiens</i>                  | Mammalia       |
| XP_001140576 | <i>Pan troglodytes</i>               | Mammalia       |
| XP_001505186 | <i>Equus caballus</i>                | Mammalia       |
| XP_002897613 | <i>Phytophthora infestans T30-4</i>  | Oomycetes      |

\* Protein ID, JGI (DOE Joint Genome Institute)

\*\*Locus ID, Broad Institute

\*\*\* EST fragment containing PNP gene

Phylogenetic analyses were carried out using Maximum Likelihood and Bayesian methods. Maximum Likelihood phylogenies were performed with PhyML 3.0 [S6] using the WAG substitution model, 100 bootstraps, 4 substitution rate categories and estimated gamma ( $\Gamma$ ) parameters and proportion of invariant sites (I). Bayesian reconstructions were performed with Mr Bayes 3.1.2 [S7] under the WAG+ $\Gamma$ 4+I model of amino acid substitution. The Markov chain Monte Carlo searches were run for 10,000,000 generations, sampling the Markov chains every 10 generations; the first 25,000 trees were discarded as 'burn-in'. Finally, the CAT and LG models implemented in Phylobayes were also used to reconstruct the phylogeny of PNP [S8]. The two independent chains run for 10,000 (CAT) and 50,000 (LG) cycles, even though both were found to rapidly converge (after 100 cycles). The posterior distributions obtained under these independent runs were compared after a burn-in of 100 (CAT) and 1,000 (LG), resulting in maxdiff values much less than 0.1 (indicative of very good runs) for CAT and lower than 0.016 for LG (indicative of very good runs). The consensus trees were obtained by pooling all the trees from both chains.

The phylogeny of the genus *Encephalitozoon* (Figure S1.A) was reconstructed using the amino acid sequences of 20 conserved genes (8155 amino acids in total) from the complete genomes of *E. cuniculi* and *E. intestinalis*, the genome sequence survey data from *E. romaleae*, and sequences from an ongoing genome project from *E. hellem*. Homologues from complete or nearly complete genomes of *Nosema ceranae* and *Antonospora locustae* were used as outgroups

Table: List of accession numbers (GenBank) and species used in phylogenetic analyses conserved Microsporidian genes.

| Protein                                 | <i>Antonospora locustae</i> * | <i>Nosema ceranae</i> | <i>E. cuniculi</i> | <i>E. hellem</i> | <i>E. intestinalis</i> | <i>E. romaleae</i> |
|-----------------------------------------|-------------------------------|-----------------------|--------------------|------------------|------------------------|--------------------|
| Actin                                   | AAB86863                      | XP_002995436          | XP_965880          | AAB86862         | XP_003072256           | JN039386           |
| DNA repair helicase RAD25               | <u>contig_340</u>             | XP_002995956          | XP_965942          | JN039409         | XP_003072319           | JN039394           |
| Enolase                                 | <u>contig_489</u>             | XP_002995378          | NP_586285          | JN039405         | XP_003073850           | JN039388           |
| Glucose-6-phosphate isomerase           | <u>contig_2954</u>            | XP_002996045          | NP_597407          | JN039408         | XP_003072875           | JN039392           |
| Hsp70NP                                 | AAC47660                      | XP_002995188          | NP_586360          | BAB69033         | XP_003073899           | JN039393           |
| Isoleucyl tRNA synthetase               | AAC41564                      | XP_002996071          | CAD26020           | BAD83624         | XP_003073958           | JN039397           |
| Mannose-1-phosphate-guanlyltransferase  | <u>contig_1173</u>            | XP_002996275          | NP_586375          | JN039402         | XP_003073916           | JN039383           |
| Methionine aminopeptidase 2             | <u>contig_868</u>             | XP_002996537          | NP_586190          | AAP51023         | ADM12396               | JN039385           |
| MCM2                                    | <u>contig_119</u>             | XP_002995530          | CAD25272           | JN039410         | ADM11370               | JN039396           |
| Pyruvate dehydrogenase E1 alpha subunit | <u>contig_369</u>             | XP_002996136          | XP_955659          | JN039403         | XP_003073591           | JN039384           |
| Phosphomannomutase                      | <u>contig_1060</u>            | XP_002994973          | NP_597365          | JN039401         | XP_003072832           | JN039381           |
| Pyruvate kinase                         | <u>contig_493</u>             | XP_002996514          | XP_955618          | JN039404         | XP_003073549           | JN039387           |
| RNA polymerase I largest subunit        | AAT12325                      | XP_002996654          | NP_584825          | JN039411         | XP_003073214           | JN039398           |
| Pyruvate dehydrogenase E1 beta subunit  | <u>contig_369</u>             | XP_002995305          | NP_584800          | JN039400         | XP_003072763           | JN039380           |
| RNA polymerase II largest subunit       | AAD12605                      | XP_002995402          | CAD26175           | JN039412         | XP_003072524           | JN039399           |
| Trehalose-6-phosphate phosphatase       | AAT12365                      | XP_002996623          | XP_965922          | JN039406         | XP_003072299           | JN039395           |
| Translation elongation factor 1 alpha   | <u>contig_559</u>             | XP_002995330          | NP_584794          | JN039407         | XP_003072757           | JN039391           |
| Tubulin alpha                           | AAC47419                      | XP_002995388          | NP_586048          | P92120           | XP_003073238           | JN039390           |
| Tubulin beta                            | AAG48935                      | XP_002995929          | NP_597591          | Q24829           | XP_003072575           | JN039389           |
| Transcription initiation factor TFIIB   | <u>contig_106</u>             | XP_002996560          | NP_585866          | JN052740         | XP_003073070           | JN039382           |

\*Contigs from *A. locustae* can be found at <http://forest.mbl.edu/cgi-bin/site/antonospora01>.

## Extended acknowledgements

We would also like to thank Sara Selman, Douglas Whitman, Magne Osteras and Loïc Baerlocher for help with sequencing, genome assembly and handling of microsporidian material, and Stephane Aris-Brosou, Toni Gabaldon and two anonymous reviewers for important comments on a previous version of this manuscript. We acknowledge access to the *Allomyces*

*macrogynus* and *Rhizopus oryzae* genome data generated by the Broad Institute and to the *Batrachochytrium dendrobatidis* and *Mucor circinelloides* genome data provided by the US Department of Energy Joint Genome Institute. We thank Hilary Morrison and acknowledge the Josephine Bay Paul Center for Comparative Molecular Biology and Evolution for the use of data included in the *Antonospora locustae* Genome Project funded by NSF.

### Supplemental References

- S1. Rutherford, K., Parkhill, J., Crook, J., Horsnell, T., Rice, P., Rajandream, M.A., and Barrell, B. (2000). Artemis: sequence visualization and annotation. *Bioinformatics* (Oxford, England) *16*, 944-945.
- S2. Altschul, S.F., Madden, T.L., Schaffer, A.A., Zhang, J., Zhang, Z., Miller, W., and Lipman, D.J. (1997). Gapped BLAST and PSI-BLAST: a new generation of protein database search programs. *Nucleic Acids Res* *25*, 3389-3402.
- S3. Edgar, R.C. (2004). MUSCLE: multiple sequence alignment with high accuracy and high throughput. *Nucleic Acids Res* *32*, 1792-1797.
- S4. Castresana, J. (2000). Selection of conserved blocks from multiple alignments for their use in phylogenetic analysis. *Mol Biol Evol* *17*, 540-552.
- S5. Capella-Gutierrez, S., Silla-Martinez, J.M., and Gabaldon, T. (2009). trimAl: a tool for automated alignment trimming in large-scale phylogenetic analyses. *Bioinformatics* (Oxford, England) *25*, 1972-1973.
- S6. Guindon, S., and Gascuel, O. (2003). A simple, fast, and accurate algorithm to estimate large phylogenies by maximum likelihood. *Syst Biol* *52*, 696-704.
- S7. Huelsenbeck, J.P., and Ronquist, F. (2001). MR BAYES: Bayesian inference of phylogenetic trees. *Bioinformatics* (Oxford, England) *17*, 754-755.
- S8. Lartillot, N., Lepage, T., and Blanquart, S. (2009). PhyloBayes 3: a Bayesian software package for phylogenetic reconstruction and molecular dating. *Bioinformatics* (Oxford, England) *25*, 2286-2288.
